# Supplementary material for: Risk factors for amyotrophic lateral sclerosis: A regional United States case‐control study
Source: PubMed Central journal article supplement — Muscle Nerve. 2020 Oct 18;63(1):52–9. doi: 10.1002/mus.27085 (PMC7821307; doi:10.1002/mus.27085), 2020-10-18
Supplement: MUS-63-52-s002.pdf [file MUS-63-52-s002.pdf]

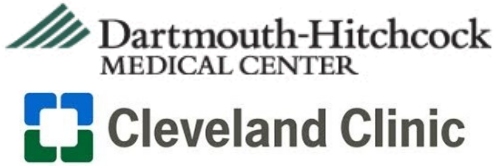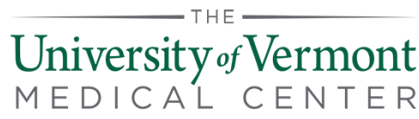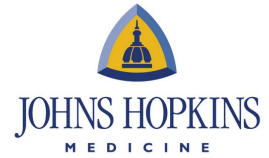

# Questionnaire for Environmental Exposures, Toxins, & Neurological Disease

The information collected in this questionnaire is being used in a **research** project led by Dr. Elijah Stommel from the Department of Neurology at Dartmouth-Hitchcock Medical Center, with site affiliations at the Cleveland Clinic, University of Vermont Medical Center, and Johns Hopkins Hospital. The purpose of this research is to identify lifetime exposure factors that affect neurological health.

Your participation in this research is important and **voluntary**. Participation involves providing the information requested in this questionnaire, which may take about an hour. You may choose to not answer some of the questions. If the researchers have any questions for you, they may wish to contact you.

Please indicate whether you agree to be contacted by the researchers in the future.

Yes, I agree to be contacted in the future:

Name \_\_\_\_\_ Phone (\_\_\_\_) \_\_\_\_\_ - \_\_\_\_\_

E-mail \_\_\_\_\_@\_\_\_\_\_.com

No, I prefer not to be contacted in the future.

The information collected for this research will be held confidentially and the researcher will protect your identity by controlling access to the research data. Neither your name nor any other identifying information about you will be used in any presentation or article written about this research. Questions about this research study should be directed to the Project Assistant at the following number or email address:

Toll-free number: 1-866-894-8131

E-mail address: neuroresearch@hitchcock.org

Where did you hear about this study and receive this questionnaire?

University of Vermont Medical Center (UVM)

Dartmouth-Hitchcock Medical Center

Cleveland Clinic Foundation

Johns Hopkins Medicine

Received Questionnaire by Mail

Other \_\_\_\_\_

Today's Date: \_\_\_ \_\_\_ / \_\_\_ \_\_\_ / \_\_\_ \_\_\_

Who is filling out this form?  Participant  Family Member  Caregiver

If you are a family member or caregiver, please fill out this questionnaire as if you were the patient/participant.

Participant's Age: \_\_\_\_\_ Participant's Gender:  Male  Female

Height 6 months ago: \_\_\_' \_\_\_", Weight 6 months ago \_\_\_\_\_ lbs.

Height at Age 25: \_\_\_' \_\_\_", Weight at Age 25: \_\_\_\_\_ lbs.

Where were you born?

\_\_\_\_\_ Town

\_\_\_\_\_ State/Province

\_\_\_\_\_ Country

What was your marital status as of 6 months ago?

Never married

Married

Separated

Divorced

Widowed

Living with partner

# Questionnaire for Environmental Exposures, Toxins, & Neurological Disease

## Personal and Family History

1. Do you have any of the following illnesses [*amyotrophic lateral sclerosis (ALS), Parkinson's diseases (PD), Alzheimer's Disease (AD)*]? Yes No

|                                          | ALS | PD | AD | Dementia | Other Neurological Disorder<br>(please specify in box) |
|------------------------------------------|-----|----|----|----------|--------------------------------------------------------|
| <b>You</b> (please check all that apply) |     |    |    |          |                                                        |

ALS Diagnosis Date: \_\_ \_\_/\_\_ \_\_/\_\_ \_\_

PD Diagnosis Date: \_\_ \_\_/\_\_ \_\_/\_\_ \_\_

AD Diagnosis Date: \_\_ \_\_/\_\_ \_\_/\_\_ \_\_

Dementia Diagnosis Date: \_\_ \_\_/\_\_ \_\_/\_\_ \_\_

Other Neurological Disorder Diagnosis Date: \_\_ \_\_/\_\_ \_\_/\_\_ \_\_

2. Has anyone in your immediate family been diagnosed with ALS, PD, AD, or Dementia?

(Check all that apply:)

|                                 | ALS | PD | AD | Dementia | Other Neurological Disorder<br>(please specify in box) |
|---------------------------------|-----|----|----|----------|--------------------------------------------------------|
| <b>Immediate Family Members</b> |     |    |    |          |                                                        |
| Mother                          |     |    |    |          |                                                        |
| Father                          |     |    |    |          |                                                        |
| Brother/Sister                  |     |    |    |          |                                                        |
| Child                           |     |    |    |          |                                                        |
| <b>Extended Family</b>          |     |    |    |          |                                                        |
| Spouse                          |     |    |    |          |                                                        |
| Maternal Grandparent            |     |    |    |          |                                                        |
| Paternal Grandparent            |     |    |    |          |                                                        |
| Maternal Aunt/Uncle             |     |    |    |          |                                                        |
| Paternal Aunt/Uncle             |     |    |    |          |                                                        |

If you have ALS, what was the site of onset? (Please check all that apply.)

Bulbar Left Arm Right Arm Left Leg Right Leg Not Applicable

Other \_\_\_\_\_

If you have Parkinson's, what was the site of onset? (Please check all that apply.)

Bulbar Left Arm Right Arm Left Leg Right Leg Not Applicable

Other \_\_\_\_\_

3. Do you have any other illnesses? Yes No If yes, what are they? \_\_\_\_\_

# Questionnaire for Environmental Exposures, Toxins, & Neurological Disease

## 4. Residential Calendar

**Directions:** The calendar on the following pages is intended to help you remember where you have lived. Write the address, town, state, & zip code next to the year you started to live in each place, beginning with your birthplace. If you lived in more than 1 place in any year, write the place where you lived the longest that year. DESCRIBE GPS/LAT/LONG

| Age | Year | Street Address<br>(not PO Box) | Town    | State | Zip<br>Code |
|-----|------|--------------------------------|---------|-------|-------------|
| 50  | 2012 | 7 Lebanon Street               | Lebanon | NH    | 03766       |
| 51  |      | ↓                              |         |       |             |
| 52  |      |                                |         |       |             |
| 53  | 2015 |                                |         |       |             |

**Draw vertical lines** to span the years lived in each place.

**Indicate the primary drinking water source** of each home to the best of your ability: public/city well, public/city surface water, private well, private surface water, or purchased bottled/filtered water.

| AGE         | YEAR | STREET ADDRESS <i>(not PO Box)</i><br>or GPS Code<br><i>(Latitude and Longitude)</i> | TOWN | STATE | ZIP | DRINKING<br>WATER<br>SOURCE |
|-------------|------|--------------------------------------------------------------------------------------|------|-------|-----|-----------------------------|
| <b>Born</b> |      |                                                                                      |      |       |     |                             |
| 1           |      |                                                                                      |      |       |     |                             |
| 2           |      |                                                                                      |      |       |     |                             |
| 3           |      |                                                                                      |      |       |     |                             |
| 4           |      |                                                                                      |      |       |     |                             |
| 5           |      |                                                                                      |      |       |     |                             |
| 6           |      |                                                                                      |      |       |     |                             |
| 7           |      |                                                                                      |      |       |     |                             |
| 8           |      |                                                                                      |      |       |     |                             |
| 9           |      |                                                                                      |      |       |     |                             |
| 10          |      |                                                                                      |      |       |     |                             |
| 11          |      |                                                                                      |      |       |     |                             |
| 12          |      |                                                                                      |      |       |     |                             |
| 13          |      |                                                                                      |      |       |     |                             |
| 14          |      |                                                                                      |      |       |     |                             |
| 15          |      |                                                                                      |      |       |     |                             |
| 16          |      |                                                                                      |      |       |     |                             |
| 17          |      |                                                                                      |      |       |     |                             |
| 18          |      |                                                                                      |      |       |     |                             |
| 19          |      |                                                                                      |      |       |     |                             |
| 20          |      |                                                                                      |      |       |     |                             |
| 21          |      |                                                                                      |      |       |     |                             |
| 22          |      |                                                                                      |      |       |     |                             |
| 23          |      |                                                                                      |      |       |     |                             |
| 24          |      |                                                                                      |      |       |     |                             |
| 25          |      |                                                                                      |      |       |     |                             |
| 26          |      |                                                                                      |      |       |     |                             |

# Questionnaire for Environmental Exposures, Toxins, & Neurological Disease

| AGE | YEAR | STREET ADDRESS <i>(not PO Box)</i> | TOWN | STATE | ZIP | DRINKING WATER SOURCE |
|-----|------|------------------------------------|------|-------|-----|-----------------------|
| 27  |      |                                    |      |       |     |                       |
| 28  |      |                                    |      |       |     |                       |
| 29  |      |                                    |      |       |     |                       |
| 30  |      |                                    |      |       |     |                       |
| 31  |      |                                    |      |       |     |                       |
| 32  |      |                                    |      |       |     |                       |
| 33  |      |                                    |      |       |     |                       |
| 34  |      |                                    |      |       |     |                       |
| 35  |      |                                    |      |       |     |                       |
| 36  |      |                                    |      |       |     |                       |
| 37  |      |                                    |      |       |     |                       |
| 38  |      |                                    |      |       |     |                       |
| 39  |      |                                    |      |       |     |                       |
| 40  |      |                                    |      |       |     |                       |
| 41  |      |                                    |      |       |     |                       |
| 42  |      |                                    |      |       |     |                       |
| 43  |      |                                    |      |       |     |                       |
| 44  |      |                                    |      |       |     |                       |
| 45  |      |                                    |      |       |     |                       |
| 46  |      |                                    |      |       |     |                       |
| 47  |      |                                    |      |       |     |                       |
| 48  |      |                                    |      |       |     |                       |
| 49  |      |                                    |      |       |     |                       |
| 50  |      |                                    |      |       |     |                       |
| 51  |      |                                    |      |       |     |                       |
| 52  |      |                                    |      |       |     |                       |
| 53  |      |                                    |      |       |     |                       |
| 54  |      |                                    |      |       |     |                       |
| 55  |      |                                    |      |       |     |                       |
| 56  |      |                                    |      |       |     |                       |
| 57  |      |                                    |      |       |     |                       |
| 58  |      |                                    |      |       |     |                       |
| 59  |      |                                    |      |       |     |                       |
| 60  |      |                                    |      |       |     |                       |
| 61  |      |                                    |      |       |     |                       |
| 62  |      |                                    |      |       |     |                       |
| 63  |      |                                    |      |       |     |                       |
| 64  |      |                                    |      |       |     |                       |

# Questionnaire for Environmental Exposures, Toxins, & Neurological Disease

| AGE | YEAR | STREET ADDRESS <i>(not PO Box)</i> | TOWN | STATE | ZIP | DRINKING WATER SOURCE |
|-----|------|------------------------------------|------|-------|-----|-----------------------|
| 64  |      |                                    |      |       |     |                       |
| 65  |      |                                    |      |       |     |                       |
| 66  |      |                                    |      |       |     |                       |
| 67  |      |                                    |      |       |     |                       |
| 68  |      |                                    |      |       |     |                       |
| 69  |      |                                    |      |       |     |                       |
| 70  |      |                                    |      |       |     |                       |
| 71  |      |                                    |      |       |     |                       |
| 72  |      |                                    |      |       |     |                       |
| 73  |      |                                    |      |       |     |                       |
| 74  |      |                                    |      |       |     |                       |
| 75  |      |                                    |      |       |     |                       |
| 76  |      |                                    |      |       |     |                       |
| 77  |      |                                    |      |       |     |                       |
| 78  |      |                                    |      |       |     |                       |
| 79  |      |                                    |      |       |     |                       |
| 80  |      |                                    |      |       |     |                       |
| 81  |      |                                    |      |       |     |                       |
| 82  |      |                                    |      |       |     |                       |
| 83  |      |                                    |      |       |     |                       |
| 84  |      |                                    |      |       |     |                       |
| 85  |      |                                    |      |       |     |                       |

5. Prior to 6 months ago, had you ever lived in a home located on or near (within a 2 mile distance) a lake, river, pond, estuary, ocean, or waterbody?

Yes, full-time residence     Yes, part-time residence     No

6. Have there ever been blue-green algae “blooms” or green surface scum on the water body’s surface?

Yes     No

If yes, which waterbodies (most recent to least recent)?

|                       |             |              |                                       |
|-----------------------|-------------|--------------|---------------------------------------|
|                       |             |              | ( ___ / _____ - ___ / _____ )         |
| <i>Waterbody Name</i> | <i>Town</i> | <i>State</i> | <i>Months/Years of Observed Bloom</i> |
|                       |             |              | ( ___ / _____ - ___ / _____ )         |
| <i>Waterbody Name</i> | <i>Town</i> | <i>State</i> | <i>Months/Years of Observed Bloom</i> |
|                       |             |              | ( ___ / _____ - ___ / _____ )         |
| <i>Waterbody Name</i> | <i>Town</i> | <i>State</i> | <i>Months/Years of Observed Bloom</i> |

7. Has the lake or waterbody ever been closed for recreation due to pollution or algae “blooms”?

Yes     No    If yes, which lake? \_\_\_\_\_

# Questionnaire for Environmental Exposures, Toxins, & Neurological Disease

## Water Usage

8. Do you use or have you used water from a lake or river for drinking?

Yes  No If yes, which lake/river? \_\_\_\_\_

9. Do you use or have you used water from a lake or river for household chores

(showering, bathing, washing dishes?)

Yes  No If yes, which lake/river? \_\_\_\_\_

## Medications/Supplements

10. Have you ever been treated for more than 6 weeks with a drug that suppresses your immune system?

(Examples: corticosteroids, methotrexate, infliximab, rituximab, entanercept, hydroxychloroquine, sulfasalazine, and other medications used in the treatment of autoimmune, joint, & skin disorders such as rheumatoid arthritis or psoriasis)

Yes  No If yes, which medications?

1. \_\_\_\_\_ for which calendar years? \_\_\_\_\_

2. \_\_\_\_\_ for which calendar years? \_\_\_\_\_

3. \_\_\_\_\_ for which calendar years? \_\_\_\_\_

11. Have you ever taken supplements containing "Spirulina" or blue-green algae?

Yes  No If yes, for which calendar years? \_\_\_\_\_

12. Have you ever undergone chemotherapy for the treatment of cancer? (Examples: Bendamustine Hydrochloride, Azacitidine, Vismodegib, Palonosetron Hydrochloride and Netupitant, Mesna, Letrozole)

Yes  No If yes, where did the cancer originate on your body? \_\_\_\_\_

For what years did you receive chemotherapy? \_\_\_\_\_

What medications did you take? \_\_\_\_\_

## Physical Trauma and Personal History

13. **Military Background:** Have you ever served in the military?

Yes  No If yes, for which years? \_\_\_\_\_ - \_\_\_\_\_

Which branch/division? \_\_\_\_\_

What were your primary activities? \_\_\_\_\_

In which war were you deployed (respond N/A if not deployed)? \_\_\_\_\_

Were you deployed outside of the USA?

Yes  No If yes, where (town/country) and for which years?

\_\_\_\_\_ (\_\_\_\_\_ - \_\_\_\_\_)

\_\_\_\_\_ (\_\_\_\_\_ - \_\_\_\_\_)

\_\_\_\_\_ (\_\_\_\_\_ - \_\_\_\_\_)

14. **Athletics:** Prior to 6 months ago, did you ever participate regularly in strenuous athletic activities, such as running, swimming, or other competitive sports (soccer, football, etc.)?

Yes  No If yes, how many years? \_\_\_\_\_ For how many hours/week? \_\_\_\_\_

15. Have you ever suffered head trauma or a concussion that caused you to black out or lose consciousness?

Yes  No

If yes, at which age group (Select all that apply)?  0-15  16-30  31-45  46-60  61+

How many injuries?  1-2  3-4  5-10  11-15  15+

## Questionnaire for Environmental Exposures, Toxins, & Neurological Disease

16. Have you ever suffered a severe electrical burn or been electrocuted?

Yes  No

If **yes**, at which age group (*Select all that apply*)?  0-15  16-30  31-45  46-60  61+

How many times?  1-2  3-4  5-10  11-15  15+

17. **Tobacco use:** Have you ever smoked more than 100 cigarettes/cigars (in your whole life)?

Never Smoked  Yes, I am a current smoker  Yes, but I have quit

If **yes**, at what age did you start? \_\_\_\_\_

At what age did you quit? \_\_\_\_\_

As of 6 months ago were you smoking?  No, not at all  Yes, some days  Yes, every day

On average, for the entire time that you smoked before 6 months ago, how many cigarettes/ cigars did you smoke per day? (1 pack=20 cigarettes) \_\_\_\_\_

18. **Occupation:** Please describe all prior jobs held for 6 or more months, the approximate number of years that you held that occupation(s), and the town or city where you worked.

| Occupation | Calendar Years | City, State, Zip Code | Full or Part-time                                                |
|------------|----------------|-----------------------|------------------------------------------------------------------|
|            | to             |                       | <input type="checkbox"/> Full <input type="checkbox"/> Part-time |
|            | to             |                       | <input type="checkbox"/> Full <input type="checkbox"/> Part-time |
|            | to             |                       | <input type="checkbox"/> Full <input type="checkbox"/> Part-time |
|            | to             |                       | <input type="checkbox"/> Full <input type="checkbox"/> Part-time |
|            | to             |                       | <input type="checkbox"/> Full <input type="checkbox"/> Part-time |

19. Did your job(s) or hobbies involve exposure to potentially harmful chemicals?

Yes  No

If **yes**, please fill in how often (weeks/month, months/year) and for which calendar years you were exposed.

| Exposure                                                 | Hours per Month | Months per Year | Calendar Years |
|----------------------------------------------------------|-----------------|-----------------|----------------|
| Lead                                                     |                 |                 | to             |
| Mercury                                                  |                 |                 | to             |
| Solvents ( <i>paint thinners, degreasers, methanol</i> ) |                 |                 | to             |
| Cooling, cutting, lubricating oils                       |                 |                 | to             |
| Pesticides                                               |                 |                 | to             |
| Insecticides                                             |                 |                 | to             |
| Other:                                                   |                 |                 | to             |

20. Have you ever had a blood or urine test for heavy metals such as lead?

Yes  No

If **yes**, please describe any positive tests: \_\_\_\_\_

## Questionnaire for Environmental Exposures, Toxins, & Neurological Disease

21. **Hobbies & Other Activities:** Did you ever participate in the following activities for at least 2 times each month for a year or longer? (If yes, please indicate the frequency and duration of each activity.)

| Hobby or Other Activity                                     | Hours/Month | Months/Year | Calendar Years |
|-------------------------------------------------------------|-------------|-------------|----------------|
| <b>Creating or Fixing Objects</b>                           |             |             |                |
| Repairing or restoring cars                                 |             |             | to             |
| Soldering, Brazing, or Tinning                              |             |             | to             |
| Carpentry                                                   |             |             | to             |
| Home remodeling/renovating                                  |             |             | to             |
| Electrical work                                             |             |             | to             |
| Use of paint strippers or thinners                          |             |             | to             |
| Casting bullets or other lead objects                       |             |             | to             |
| Making or using lead fish weights/sinkers                   |             |             | to             |
| Metal work                                                  |             |             | to             |
| Mercury amalgamation (dentistry)                            |             |             | to             |
| <b>Outdoor Activities</b>                                   |             |             |                |
| Animal husbandry                                            |             |             | to             |
| Farming/Agriculture                                         |             |             | to             |
| Hunting or shooting, either animals, skeet, trap or targets |             |             | to             |
| Gardening or lawn care                                      |             |             | to             |
| Burning trash                                               |             |             | to             |
| <b>Art</b>                                                  |             |             |                |
| Oil painting (fine art)                                     |             |             | to             |
| Using pastels/pigments                                      |             |             | to             |
| Make silver jewelry                                         |             |             | to             |
| Polished or ground gemstones using lead                     |             |             | to             |
| Done enameling                                              |             |             | to             |
| Glass blowing                                               |             |             | to             |
| Make stained glass or art glass using lead joints           |             |             | to             |
| Pottery/Ceramics                                            |             |             | to             |
| <b>Water Activities</b>                                     |             |             |                |
| Swimming in lakes or rivers                                 |             |             | to             |
| Boating, sailing, or kayaking                               |             |             | to             |
| Water skiing                                                |             |             | to             |
| Wind surfing                                                |             |             | to             |
|                                                             |             |             |                |



# Questionnaire for Environmental Exposures, Toxins, & Neurological Disease

## Demographics

22. What was your family yearly income before taxes 6 months ago? Please include all personal income, income from your spouse and income from other members of your household. Which range corresponds to your family income range?

- Less than \$9,999   
  \$10,000-\$19,999   
  \$20,000-\$29,999   
  \$30,000-\$39,999   
  \$40,000-\$49,999  
 \$50,000-\$59,999   
  \$60,000-\$79,999   
  \$80,000-\$149,999   
  \$150,000+   
  I Do Not Know

23. How many years of schooling have you completed prior to 6 months ago? \_\_\_\_\_

24. What is the highest degree that you have attained prior to 6 months ago?

- Grade school (grades 1-8)                     
  High School diploma                     
  Technical or trade school diploma  
 College diploma                                     
  Graduate school diploma   
  Other: \_\_\_\_\_

What do you consider to be your race or ethnic group? *Please check all that apply.*

- White   
  Black, African American   
  Asian Indian   
  Chinese   
  Filipino   
  Japanese                     
  Korean  
 Vietnamese   
  Puerto Rican   
  Cuban   
  Native Hawaiian   
  Guamanian or Chamorro   
  Samoan  
 American Indian or Alaskan (Specify name of enrolled or principal tribe \_\_\_\_\_)  
 Other Asian (specify race \_\_\_\_\_)  
 Other Pacific Islander (specify race \_\_\_\_\_)  
 Other Spanish/Hispanic/Latino (specify race \_\_\_\_\_)

**Dietary Consumption of Fish and Shellfish (Questions 25-28)** *Please answer the following questions in regards to your dietary habits over the past 10 years.*

25. Prior to the 6 months ago, did you eat seafood (fish or shellfish) more than 15 times per year?  Yes  No

26. Have you **caught** freshwater or marine fish for food?  Yes  No

27. Have you eaten the fish, shellfish you **catch**?  Yes  No

If **yes**, provide details:

|                       |             |              |                |                        |              |
|-----------------------|-------------|--------------|----------------|------------------------|--------------|
| _____                 | _____       | _____        | _____          | _____                  | _____        |
| <i>Waterbody Name</i> | <i>Town</i> | <i>State</i> | <i>Species</i> | <i># Consumed/Year</i> | <i>Years</i> |
| _____                 | _____       | _____        | _____          | _____                  | _____        |
| <i>Waterbody Name</i> | <i>Town</i> | <i>State</i> | <i>Species</i> | <i># Consumed/Year</i> | <i>Years</i> |
| _____                 | _____       | _____        | _____          | _____                  | _____        |
| <i>Waterbody Name</i> | <i>Town</i> | <i>State</i> | <i>Species</i> | <i># Consumed/Year</i> | <i>Years</i> |

28. Have you **bought** freshwater or marine fish for food more than 15 times per year?  Yes  No

If **yes**, please enter what types of commercially/domestically caught shellfish/fish have you **bought** and then eaten and write their names in the appropriate column(s) below? (*i.e. Clams, Oysters, Mussels, Lobster, Catfish, Trout, Anchovies, Salmon, Grouper, Cod, Snapper, Perch, Halibut, Canned Tuna, Mahi Mahi, Mackerel, Marlin, Shrimp, Scallop, Walleye, Perch, Smallmouth/Largemouth/Sea Bass, White Sucker, Carp, Bluegill, Black Crappie, White Crappie*)

| Seafood Types Weekly | Seafood Types Monthly |
|----------------------|-----------------------|
|                      |                       |
|                      |                       |
|                      |                       |
|                      |                       |

*Thank you for completing this survey.*

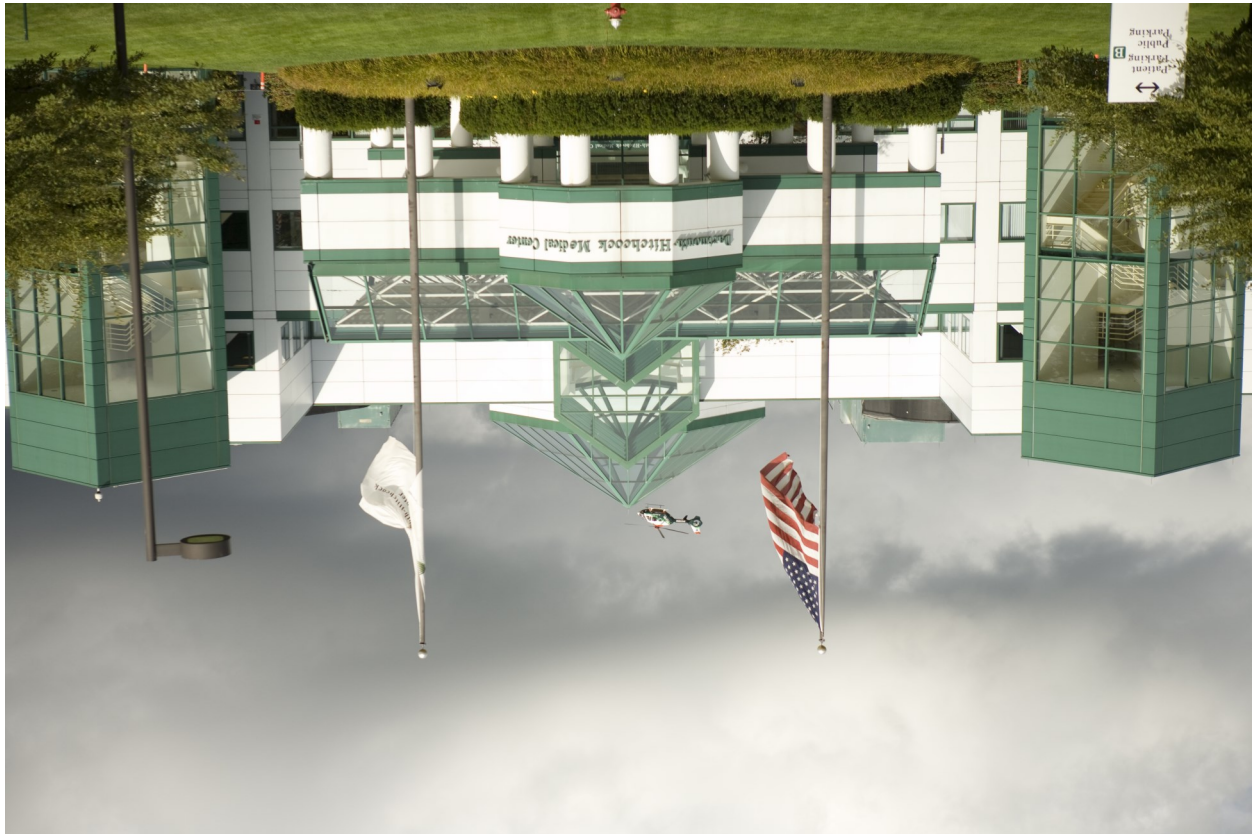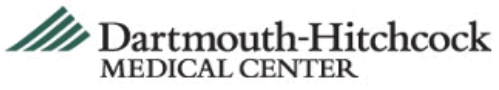

Dr. Elijah Stommel, Neurology  
Dartmouth-Hitchcock Medical Center  
One Medical Center Drive  
Lebanon, NH, 03756

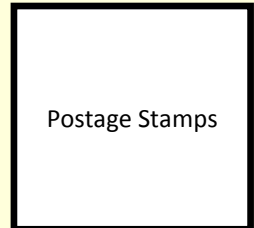

Dr. Elijah Stommel, Neurology  
Dartmouth-Hitchcock Medical Center  
One Medical Center Drive  
Lebanon, NH, 03756
